# Supplementary material
Source: PubMed Central journal article supplement (PMC8408456)
Supplement: szczupak_supp_legends_bhab112.pdf [file szczupak_supp_legends_bhab112.pdf]

Supplementary Figure 1. Lateral entorhinal cortex. Tract-tracing of the lateral entorhinal cortex (ENTl). (A) Injection site (IS). (B) The ENTl sends most of its interhemispheric projections via the anterior commissure (AC), but a small fraction of ENTl projections cross the midline via the corpus callosum (CC), as shown in (C). (D) 3D reconstruction of ENTl projecting fibers in an axial view. Scale bars in  $\mu\text{m}$ .

Supplementary Figure 2. Piriform cortex. Tract-tracing of the piriform cortex (PIRl). (A) Injection site (IS). (B) The PIR sends all of its cortical interhemispheric projections via the anterior commissure (AC). (D) 3D reconstruction of PIR projecting fibers in an axial view. Scale bars in  $\mu\text{m}$ .
